# Supplementary material for: H3K27me3 Signal in the Cis Regulatory Elements Reveals the Differentiation Potential of Progenitors During Drosophila Neuroglial Development
Source: PubMed Central journal article supplement (PMC6818177; doi:10.1016/j.gpb.2018.12.009), 2019-06-11

**A** Significantly decreased expression of genes with significantly increased H3K27me3 signals in their promoters

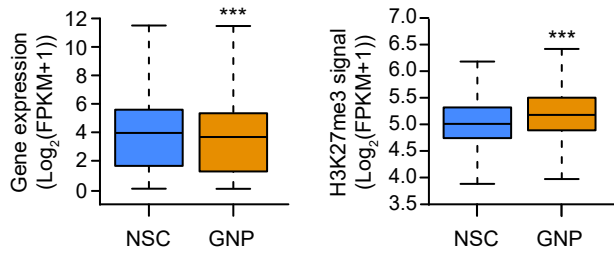

**B** Significantly increased expression of genes with significantly decreased H3K27me3 signals in their promoters

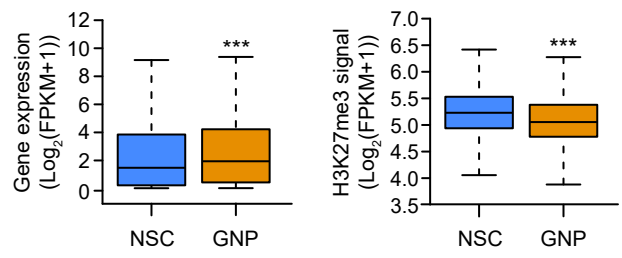

Supplement: mmc1.pdf [file mmc1.pdf]
