# Supplementary material for: H3K27me3 Signal in the Cis Regulatory Elements Reveals the Differentiation Potential of Progenitors During Drosophila Neuroglial Development
Source: PubMed Central journal article supplement (PMC6818177; doi:10.1016/j.gpb.2018.12.009), 2019-06-11

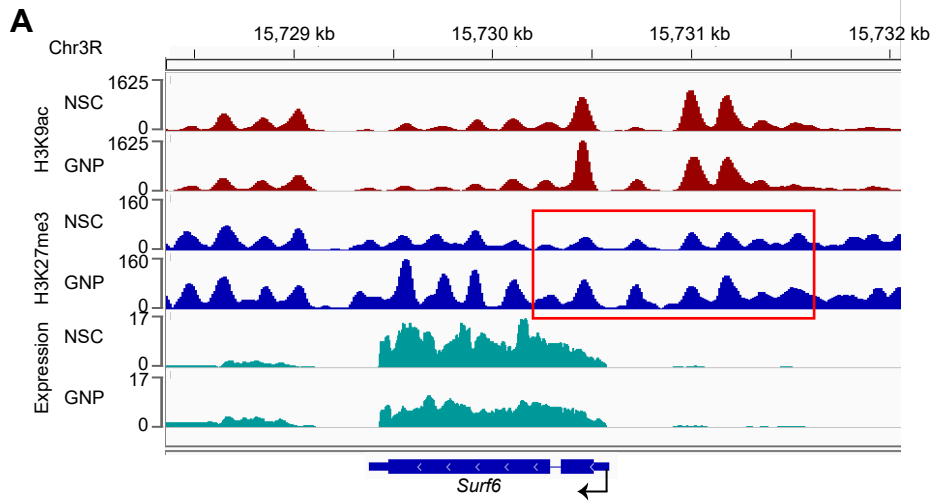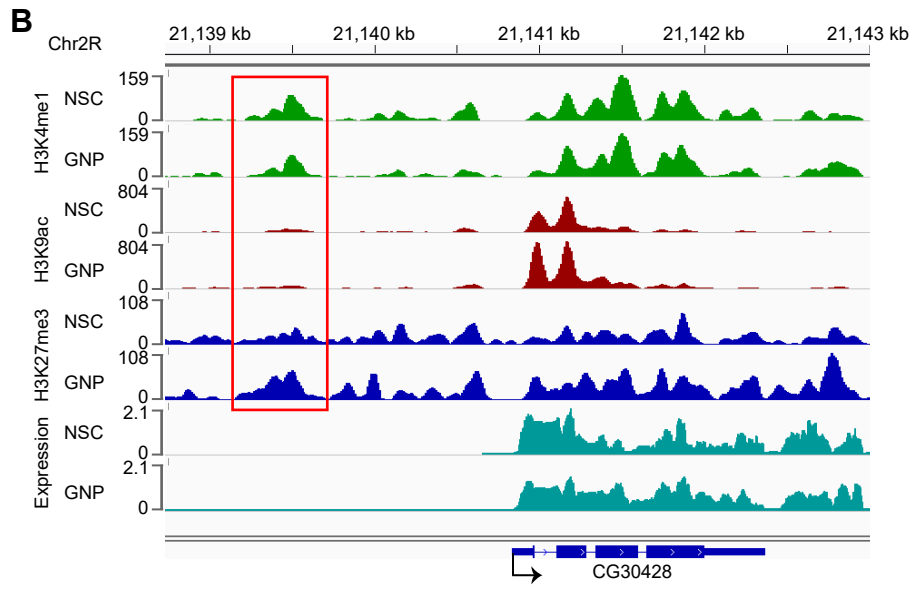

Supplement: mmc2.pdf [file mmc2.pdf]
